1 **Title**

2 Neither wood ash application nor phosphorus-fertilisation mitigated the negative effects of whole-tree  
3 harvesting on a temperate oligotrophic forest.

4

5

6

7 **Authors**

8 Laurent Augusto <sup>a,\*</sup>

9 Florent Beaumont <sup>a</sup>

10 Christophe Nguyen <sup>a</sup>

11 Jean-Yves Fraysse <sup>b</sup>

12 Pierre Trichet <sup>a</sup>

13 Céline Meredieu <sup>c,d</sup>

14 David Vidal <sup>a</sup>

15 Valérie Sappin-Didier <sup>a</sup>

16

17 a INRAE, Bordeaux Sciences Agro, ISPA, F-33140 Villenave d'Ornon, France

18 b FCBA, F-33610 Cestas, France

19 c INRAE, UEFP, F-33610 Cestas, France

20 d INRAE, Univ. Bordeaux, BIOGECO, F-33610 Cestas, France

21

22

23 **Abstract**

24 Background and Aims: Concerns about climate change and carbon economy have prompted the  
25 promotion of alternative energy sources, including forest-based bioenergy. An evaluation of the  
26 environmental consequences of intensive harvests (stumps and roots, and also branches and foliage) for  
27 energy wood supply, and use of wood-ash recycling as a compensatory practice, helps in the analysis of  
28 the use of forest biomass for energy production.

29 Methods: After 11 years, we made use of records from a split-plot experimental site crossing four  
30 different intensities of Biomass Harvesting (Stem-Only Harvest [SOH], Aboveground Additional  
31 Harvest [AAH], Belowground Additional Harvest [BAH], and Whole-Tree Harvest [WTH]) and three  
32 Compensation Methods (control [C], wood ash application [A] and phosphorus fertilisation [P]) to  
33 evaluate their effects on tree growth, soil fertility, chemical properties and soil carbon. This site is  
34 located in a maritime pine forest on a poor soil, under a warm temperate climate (SW France).

35 Key results: Despite their low additional biomass exports (+10% for AAH to +34% for WTH), the non-  
36 conventional harvest practices exported much higher quantities of nutrients than the conventional SOH  
37 technique (for example +145% for N and K in WTH). Consequently, these treatments had several effects  
38 on the soil nutritive status. Additional biomass harvests impacted the soil organic matter content, with  
39 negative effects on  $P_{\text{-organic}}$  and soil cation exchange capacity. However, data suggested that tree growth  
40 and foliage nutrient content had not yet been significantly impacted by harvest treatments, whereas tree  
41 nutritional status was improved by P-fertiliser or wood ash. As expected, we observed a positive effect  
42 of wood ash application on soil acidity and nutrient content but, like additional harvests, wood ash  
43 application decreased the pool of soil organic carbon (~10% of the initial stock with ~7% of  $N_{\text{-total}}$   
44 losses).

45 Conclusions: Overall, this factorial experiment showed that exporting more forest biomass due to the  
46 additional harvesting of tree canopies, stumps and roots had negative consequences on the ecosystem.  
47 Additional harvests have aggravated the poverty of the already oligotrophic soil, which in turn may  
48 decrease tree growth and the soil organic carbon content in the future (but without any impact on either  
49 soil acidity or on trace metal contents). Importantly, applying nutrients as fertiliser or wood ash did not  
50 compensate for the negative impact of biomass exports and the method of wood ash recycling in forests  
51 could even decrease the soil organic carbon.

## 52 **Introduction**

53 Most recent reports of the Intergovernmental Panel on Climate Change have concluded that climate  
54 change is accelerating and requires rapid mitigation policies (IPCC 2014). These policies rely on two  
55 main and complementary approaches: the emission of less greenhouse gases (GHG), and the  
56 sequestration of more carbon dioxide (CO<sub>2</sub>) from the atmosphere. Forest ecosystems can do both,  
57 depending on whether they are disturbed or not (Thom and Seidl 2016). Due to their large carbon  
58 contents (Pan et al. 2011), and because they represent a large proportion of land (Bastin et al. 2017),  
59 forests are pivotal ecosystems with respect to the Earth's carbon cycle. However, although there is a  
60 consensus that forests constitute an important leverage for climate change mitigation (IPCC 2014), there  
61 is a heated debate on how forests should be managed for mitigation purposes (Lindner and Karjalainen  
62 2007): the *old-growth* strategy consisting of sequestering carbon in the ecosystem, conflicts with the  
63 *intensive biomass harvest* strategy, which proposes to harvest more woody biomass to replace fossil C  
64 in the production of manufactured objects and energy (Bright et al. 2012; Schulze et al. 2012; Haberl et  
65 al. 2013; Luysaert et al. 2018). In particular, additional harvesting of forest biomass, such as foliage,  
66 branches, stumps, and roots (Nicholls et al. 2009), for energy production can impoverish forest  
67 ecosystems because these tree compartments dedicated to energy wood supply –the so-called *harvest*  
68 *residues* or *logging residues*– are rich in nutrients (Andre et al. 2010; Achat et al. 2015a; Augusto et al.  
69 2015a). Review studies indicate that intensive biomass harvesting –as compared with conventional  
70 harvesting– can have negative consequences on ecosystem functioning, such as soil nutrients and  
71 organic matter pools, and consequently on the level of soil productivity for following forest  
72 establishment (Thiffault et al. 2011; Wall 2012; Achat et al. 2015a). Extracting more biomass from  
73 forests without any compensatory fertilisation seems to be an unsustainable leverage for climate change  
74 mitigation (Garcia et al. 2018). Therefore, it has been proposed that intensive harvests should be  
75 associated with compensatory practices (Nohrstedt 2001; Ranius et al. 2018; Ventura et al. 2019).

76 Applying wood ash is often promoted as a good method to compensate for the negative effects of  
77 intensive harvests on the ecosystem nutrient budget (Hannam et al. 2018; Ranius et al. 2018; Ventura et  
78 al. 2019). Indeed, wood ash has a high nutrient content (Aronsson and Ekelund 2004), can reduce soil  
79 acidity (Reid and Watmough 2014) and contributes to the concept of *circular bioeconomy* as wood ash

80 returns some of the nutrients that were exported by the removal of logging residues (Pitman 2006). On  
81 the other hand, applying wood ash might contaminate ecosystems because of its relatively high content  
82 in several micronutrients or non-essential metals (Vance 1996; Nnadi et al. 2019). However, other  
83 studies conclude that, based on the metal content of wood ash, a single application per forest rotation  
84 may not result in a significant increase in soil metal content and might even improve the micronutrient  
85 status of trees (Pitman 2006). Unfortunately, while several meta-analyses have been carried out on  
86 intensive biomass harvests (Thiffault et al. 2011; Achat et al. 2015a) or wood ash application (Augusto  
87 et al. 2008a; Reid and Watmough 2014), a combination of these two practices at the time of clear-cutting  
88 and prior to reforestation have rarely been studied together to assess their interactive consequences  
89 (Hagerberg and Wallander 2002; Wang et al. 2010). Therefore, we conducted a field experiment whose  
90 main objective was to evaluate their interactions.

91 Located in south-western France, the *Landes de Gascogne* forest, where our study took place, has several  
92 advantages for evaluating the environmental consequences of intensive harvests and their compensatory  
93 practices. Firstly, it is a large man-made pine forest almost entirely dedicated to intensive forestry. As  
94 such, the area is already subjected to collection of harvest residues (mainly stumps and roots, and to a  
95 lesser extent also branches and needles (Mora et al. 2014; Banos and Dehez 2017)) for energy wood  
96 consumption (Augusto et al. 2010, 2015a), which in turn produces large amounts of wood ash (Alvarez-  
97 Alvarez et al. 2018). Secondly, because this forest is strongly oligotrophic (Augusto et al. 2010), it has  
98 been diagnosed to be particularly sensitive to the potential negative consequences of intensive harvest  
99 (Durante et al. 2019). Finally, it is a warm-temperate forest. Indeed, knowledge about wood ash  
100 application and removal of logging residues is based on studies carried out in boreal forests (Augusto et  
101 al. 2008a; Walmsley and Godbold 2010), whereas the consequences of these management practices are  
102 probably climate-dependent. For instance, Achat *et al.* (2015b) found that exporting tree canopies  
103 generally decreases the pool of soil organic carbon (SOC) under temperate climates, but not under cold  
104 climates. Similarly, several Nordic studies indicated that stump harvests had no effect on SOC while  
105 studies conducted in warmer latitudes concluded that the impact was highly negative (Zabowski et al.  
106 2008; Stromgren et al. 2013; Jurevics et al. 2016).

107 Our initial expectations were based on the current knowledge about intensive biomass harvest or wood  
108 ash application, in comparison with the local conditions of climate, soils, and forestry. More explicitly,  
109 we expected the following effects (Table 1).

110 Hypothesis H1: the soil phosphorus, the most limiting nutrient in the sandy acidic soils of the study  
111 region (see Materials and Methods), would be decreased by intensive harvests (Achat et al. 2015a) and  
112 would be only partly compensated for wood ash by which has a low phosphorus content and low  
113 bioavailability (Steenari and Lindqvist 1997; Fransson et al. 1999).

114 H2: the sequestration rate of C into forest biomass (estimated as the growth rate of the subsequent forest  
115 stand) would be decreased by intensive harvests because the local soils are nutrient poor (Achat et al.  
116 2009, 2015a), and would not be compensated for wood ash due to its low value as a P-fertiliser (see H1;  
117 Table 1).

118 H3: the size of the soil organic matter pool (and related organic carbon and nitrogen (N)) would be  
119 decreased by intensive harvests as for most temperate forests (Achat et al. 2015a, b), but might remain  
120 unaffected by wood ash application as observed in boreal forests (Augusto et al. 2008a).

121 H4: the soil would be acidified by intensive harvest, but neutralised by wood ash (Reid and Watmough  
122 2014; Achat et al. 2015a). The local soils are already quite acidic (Augusto et al. 2010), and we expected  
123 the liming effect to prevail over the acidifying effect. The durability of neutralisation after a single ash  
124 input in this type of forest remains to be determined.

125 H5: the trace metal content in the ecosystem, and its bioavailability, would not be affected either by  
126 biomass harvests or by wood ash application. These expectations were based on two rationales. Firstly,  
127 the local pine trees contain moderate amounts of trace metals in their biomass (Saur et al. 1992; Trichet  
128 et al. 2018), which implies moderate exports through biomass harvest, and small returns through the  
129 dose of wood ash applied in our field trial. This assumption is in line with current knowledge, mostly  
130 based on Nordic podzols. Secondly, as the application of wood ash is expected to induce an increase in  
131 pH, the bioavailability of metals might decrease (Cappuyns and Swennen 2008).

132

133

134

## 135 **Materials and Methods**

### 136 *Study region and experimental site*

137 The *Landes de Gascogne* area is a flat region ~1.3 Mha in south-western France (between 43.5 and  
138 45.5°N, and 1.5°W and 0.3°E). The climate is oceanic, usually with a dry season in summer and a wet  
139 season in winter and/or in spring (annual rainfall is around 900 mm per year, with a North-South  
140 gradient). Soils are sandy podzols (9–14% fine sands; 80–89% coarse sands), which are classified as  
141 more or less hydromorphic and humic (an “entic podzol” in the WRB soil classification), or with a  
142 hardpan (an “ortsteinic podzol”; (Augusto et al. 2010)). They developed in Aeolian deposits of  
143 quaternary sands (the *Sables des Landes*) and are characterized by their coarse particle size and their  
144 high quartz content (Bertran et al. 2011). Soils are acidic and poor in nutrients, particularly in  
145 phosphorus (P) and they have been identified as being among the poorest soils in P in the world (in this  
146 region = 60  $\mu\text{g-P}_{\text{total}} \text{g}^{-1}$ , and a global mean value  $\approx 500 \mu\text{g-P}_{\text{total}} \text{g}^{-1}$ ; (Achat et al. 2009; Bredoire et al.  
147 2016)). The vegetation was formally a mosaic of heathlands and wetlands, probably derived from  
148 human-degraded forests (Jolivet et al. 2007). During the 18<sup>th</sup> and 19<sup>th</sup> centuries, the French central  
149 government promoted the installation of big farms, most of which failed to survive due to the harsh local  
150 conditions (poor acidic soils, and extremely low soil water contents in summer alternating with periods  
151 of waterlogging). From 1857, a forest of ~1.0 Mha forest was progressively created thanks to a law  
152 inciting the sowing of a local species, the Maritime pine (*Pinus pinaster* Ait.), combined with the use of  
153 ditches for drainage. Initially grown for its resin, Maritime pine is now used for wood production and is  
154 often P-fertilised at plantation to alleviate the main nutritional limitation of the region (Trichet et al.  
155 2009). As a result of two storms (in 1999 and 2009), with the development of stump removal practices  
156 and an incentive policy for biomass power plant installation, the practice of collecting *harvest residues*  
157 as biomass-based energy sources is currently spreading (Banos and Dehez 2017).

158 The site used for this study is called the *Forêt du Nezer* (44.57°N, 1.05°W; elevation = 21 m asl;  
159 slope < 1%; soil type predominantly an entic podzol). Its name came from Daniel Nezer, a Swiss banker  
160 who initiated the first attempt to develop a large agricultural complex in 1766 (the *Colonie de Nezer*),  
161 but which eventually ruined him (Sargos 1997). After this short farming period, the site returned to  
162 heathlands before becoming a pine forest during the second half of the 19<sup>th</sup> century (see above).

163

164 *Experimental design and field procedures*

165 The experimental site is a split-plot factorial design, crossing four different intensities of *Biomass*  
166 *Harvesting* (BH factor in main plots) and four *Compensation Methods* by applying wood ash or  
167 phosphorus fertilisation (CM factor in subplots nested in BH plots), resulting in sixteen treatments  
168 replicated in three blocks (Figure S1). Contrary to the CM treatments, the BH treatments had to be  
169 applied to large plots (main plots) because they required the use of large machines.

170 After the clear-cut of a 45-year-old stand in April 2007, twelve large square plots, 100 × 100 m (1 ha  
171 large), were established in order to apply the three blocks × four *Biomass Harvesting* treatments,  
172 described below:

173 1- Stem-Only Harvest ('SOH'; stem harvest down to 7 cm of diameter above bark) without any residue  
174 harvest (exports = stems: this has been the local conventional practice for decades),

175 2- Aboveground Additional Harvest ('AAH'), which included stem harvest with additional harvesting  
176 of branches with part of their foliage (see below; exports = stems + canopies; canopy = branches +  
177 twigs + foliage),

178 3- Belowground Additional Harvest ('BAH'), which included stem (without branches, twigs, and  
179 foliage) harvest with additional harvesting of stumps and roots (exports = stems + stumps + roots),

180 4- Whole-Tree Harvest ('WTH') with additional harvest of all other tree compartments (exports = stems  
181 + branches + twigs + foliage + stumps + roots).

182 The conventional harvesting (clear-cut) was carried out in April 2007, with particular attention to the  
183 slash (branches and needles) which was gathered in each of the four 1 ha plots (Figure S2a). In June  
184 2007, the branches were bundled, forwarded from the six main plots (AAH-WTH  
185 plots × 3 blocks; Figure S2b-d), and finally transported to the power plant. The time-lapse between this  
186 harvest and the clear-cut has enabled a partial fall of the foliage (needles, in unquantified proportions).

187 Then, in July-August 2007, the stumps were excavated with their main roots, fragmented into a few  
188 pieces, and left on the ground in the six main plots (BAH-WTH plots × 3 blocks; Figure S2e-g),  
189 enabling the natural removal of the soil particles by the rain. These fragments were harvested in February  
190 2008. Two years after clear-cutting, in January 2009, the area was strip ploughed to a depth of 0.3 m,

191 and was replanted with 1,250 per hectare ( $4 \times 2$  m) of one-year-old maritime pine seedlings of local  
192 origin.

193 Forty-eight small sub-plots,  $50 \times 50$  m (0.25 ha) wide, were established within the two-year-old  
194 plantation. Four sub-plots of compensation methods (CM factor) were nested in every main plot  
195 (dedicated to a BH treatment; Figure S1). The *Compensation Methods* were applied in July 2011 for the  
196 wood ash and in December 2011 for the other fertilisers, as follows:

197 1- Control: no nutrient application ('C'),

198 2- Phosphorus fertilisation ('P'), considered as standard in this forest area (application of 60 kg-P<sub>2</sub>O<sub>5</sub>  
199 per hectare in the form of superphosphate (30% P<sub>2</sub>O<sub>5</sub>)),

200 3- Phosphate-potassium fertilisation (the same P treatment as above with the addition of 60 kg-K<sub>2</sub>O per  
201 hectare in the form of potassium sulphate (50% K<sub>2</sub>O)). It should be noted that this CM treatment was  
202 not included in this study.

203 4- Wood ash application ('A') consisted of the application of 5 Mg of loose ash per hectare (provided  
204 by a local power biomass plant). Taking into account the total phosphorus content of the wood ash, it  
205 corresponded to a dose of 62 kg-P<sub>2</sub>O<sub>5</sub> per hectare (regardless of P forms). The ash composition is shown  
206 in the Table S1.

207

208 The WTH-C combined treatment was included to simulate the most severe harvest condition where all  
209 forest residues were removed from the site and with no nutrient application. Although unusual, this  
210 harvest management without any compensation system could be implemented if the objective is to  
211 maximize biomass production in the case of high prices for energy wood. Conversely, the SOH-P  
212 treatment is considered as the current usual stand management of local forest owners.

213

#### 214 *Plant measurements and field sampling*

215 Estimates of biomass and nutrient exports (*Biomass Harvesting* factor):

216 The quantity of biomass, and associated nutrients, exported from the plots due the Biomass Harvest  
217 treatments were estimated, based on a combination of measurements and models. In practice, before



218 clear-cutting the standing pine stand, all trees were identified and each diameter was measured at breast  
219 height ( $\approx 1.3$  m).

## 220 Biomass estimates

221 Then, we selected 14 trees that represented the range of stem size of the forest. All these trees were cut  
222 down and studied intensively:

223 (i) the stem diameter was measured, and wood disks were sampled, at several heights (0 m, 0.5 m, 1.3 m,  
224 and then every 2 m); the wet mass and the dry mass of the stem disks (wood and bark, separately) were  
225 measured,

226 (ii) the diameter of all branches was measured at 10 cm from their insertion level,

227 (iii) the total dry mass of three branch classes (living branches, treetop [*i.e.* the upper part of the stem,  
228 at diameter  $< 7$  cm], dead branches) were weighed (all branches of each class were pooled),

229 (iv) the dry mass of 5 living branches (wood + bark + foliage) per tree was weighed, and

230 (v) the dry mass values of the stem wood, and the stem bark, were measured separately.

231 The total dry mass by compartment of each sampled tree was then calculated. The tree size  
232 measurements (diameter at breast height) were used to estimate the biomass of the different tree  
233 compartments using allometric relationships (unpublished FCBA models, calibrated with 45 trees  
234 distributed in 5 other pine stands of a similar age). The estimated biomass values of the tree  
235 compartments were consistent with the measured values, so the models were used to calculate the  
236 biomass at the plot scale, based on the inventory of all trees (measurements of the diameter at breast  
237 height).

238 The effective export rate of the different tree compartments was estimated in different ways, depending  
239 on the compartment studied:

240 (i) stem wood was assumed to be harvested in totality (export rate = 100%),

241 (ii) stem bark harvests were quantified by collecting all the bark that remained on the floor of a given  
242 area, after the stems exported from five other stands of the region (FCBA unpublished data; export rate  
243  $\approx 80\%$ ),

244 (iii) the effective exports of the canopies (*i.e.* branches + twigs + foliage) and of the tree belowground  
245 (stump + roots) were estimated by direct measurements of the harvests realised. In practice, the

246 harvested canopies were gathered into ~2.5 m long bundles (n = 465 in total), labelled per plot, and  
247 taken to the local power biomass plant. Bundles were weighed individually (fresh weight = 225-253 kg;  
248 mean weight = 240 kg), and 20 bundles were taken at random to estimate their dry matter content (mean  
249 dry content = 67% of the initial mass). All bundles were crushed to provide pellets for the power plant.  
250 During the crushing stage, 36 samples of biomass were taken at regular time intervals (Figure S2) to  
251 estimate the dry matter content. This procedure enabled us to estimate the effective harvest rate of the  
252 canopy. Conversely, it was not logistically feasible to measure the effective rates for foliage, twigs, and  
253 large branches. Based on visual observations and on field studies (Stupak et al. 2008), we assumed that  
254 (i) the twig harvest rate was 30% higher than that of the foliage, and (ii) the branch harvest rate was  
255 50% higher than that of the twigs. Finally, based on these ratios and on the measured harvest rate of the  
256 whole canopy, the harvest rate values were adjusted. The values of the nutrient content in the different  
257 canopy compartments (*i.e.* needles, twigs, branches, stembark, stemwood) were the mean values  
258 measured on samples from the 45 trees used to build allometric relationships (see above). These mean  
259 values were within the ranges commonly observed in the study region (Augusto et al. 2008b; Trichet et  
260 al. 2018).

261 A similar approach to that used for branches was used for the belowground biomass. In practice, the  
262 potentially available belowground biomass (*i.e.* stump + roots) was estimated for each tree based on  
263 allometric relationships that use the stem diameter at breast height as predictive variable (Augusto et al.  
264 2015a). The realised belowground biomass harvest was estimated from the weight of all the fresh  
265 biomass per plot (by weighing the trucks, with and without the transported biomass). The water content  
266 of the biomass was measured on 36 samples in order to calculate the dry biomass (Figure S2g; sampling  
267 at regular intervals during the crushing flow; mean value per plot of the dry content = 65-72%). These  
268 samples were used also for nutrient analyses. The measured values of nutrient content in stumps and  
269 roots were within the ranges commonly observed (Augusto et al. 2015a), except for the potassium  
270 content, which was higher in the present study (1.50 versus 0.99 mg g<sup>-1</sup>).

271 All these measurements and analyses enabled us to quantify the standing biomass before the Biomass  
272 Harvest treatments, and the effective exports due to harvests in terms of biomass and nutrients.

273

274 *Field measurements in the subsequent forest plantation*

275 Tree growth and needle sampling:

276 The growth rate of the new plantation –established after biomass harvest– was assessed simply by  
277 measuring the standing biomass of the young trees. Indeed, because the survival rate of the planted  
278 seedlings was nearly 100%, and not affected by experimental treatments, the stand density was the  
279 almost the same in all subplots. The individual size of trees was estimated by measuring at least 50  
280 pines, chosen at random, per subplot. Tree height and stem circumference at breast height were measured  
281 in December 2015 and 2019 (*i.e.* on 7- and 11-year-old trees). The aboveground biomass was then  
282 estimated based on allometric relationships (Vidal et al. 2019).

283 Needles were sampled to assess the nutritive status of trees, and their degree of contamination by trace  
284 elements. For this, 8 pines were first selected at random in each subplot. Current-year needles were  
285 collected in December 2019 using a telescopic pruner. Needles were collected in the upper third of the  
286 canopy, where sunlight is always directly available, and in two opposite directions.

287 The needles were cleaned in a bath of demineralised water before being dried with absorbent paper and  
288 then placed in an oven for ten days at a temperature of 40°C. In order to have the most homogeneous  
289 needle composite samples, and to avoid the operator effect, about 10% of the weight of the overall  
290 sample was taken at random. For this, ten needles were taken from each of the 8 batches of needles.

291

292 Understorey survey:

293 The understorey composition was assessed in May 2019, using the “*phytovolume*” approach (Gonzalez  
294 et al. 2013; Vidal et al. 2019). In practice, the same pair of operators surveyed all the surface area of the  
295 studied subplot, and then estimated the soil cover percentage of the main plant functional types (*i.e.* the  
296 perennial herb *Molinia caerulea*, the bracken fern *Pteridium aquilinum*, ericaceous shrubs (*Calluna*  
297 *vulgaris* and *Erica scoparia*), and the common gorse *Ulex europaeus*). To help the operators’ work, we  
298 printed patterns representing surface areas with defined cover values (assessed in increasing classes:  
299 1%, 2%, 3%, 5%, 7%, 10%, and then +5% up to 95%). The mean height of each plant functional type  
300 was estimated based on three height measurements representative of the plant height range in the  
301 surveyed area (Figure S3). The phytovolume value was computed as the product of the ground cover

302 (estimated in squares of 16 m<sup>2</sup>) and the plant height. Finally, the phytovolume value was converted into  
303 estimates of plant aboveground biomass using dedicated allometric relationships that were previously  
304 calibrated with destructive measurements of the standing biomass (Gonzalez et al. 2013; Vidal et al.  
305 2019).

306

307       Soil sampling:

308 The topsoil was sampled in all of the 36 subplots studied. To do this, a systematic grid of 8 sampling  
309 points was used per subplot: 4 points on the tree ridges, and 4 points in the furrows, to capture the spatial  
310 distribution of the topsoil induced by the regular design of the strip ploughing and tree plantation and  
311 by subsequent operations of understorey control (*i.e.* a bladed roller passing in the furrows). At each  
312 sampling point, the forest floor layer was gently removed. Then the topsoil was sampled using a corer  
313 (length = 15 cm; diameter = 8 cm). All samples were bulked in the field, and continuously homogenised  
314 by hand until the composite sample showed no heterogeneity. The soil bulk density (kg L<sup>-1</sup>) was  
315 estimated based on a pedo-transfer function specifically calibrated for the local soils (Augusto et al.  
316 2010).

317

318       *Laboratory analyses*

319       Plant analyses:

320 The needle samples were dried at 40°C for 7 days to constant weight and ground (< 1µm) using a IKA  
321 M20 (mill in titanium to avoid contamination of the sample).

322 Aliquots of powdered samples (0.25g) were digested using a mixture of 1 ml HNO<sub>3</sub> (69% vol Aristar®  
323 for trace element analysis, VWR Chemicals) and 4 ml H<sub>2</sub>O<sub>2</sub> (30% vol, Ultratrace®, ppttrace analysis  
324 grade, Scharlau) in DigiPREP System in dry bath blocks. Then, the solution was filtered to 0.45 µm and  
325 the volume adjusted at 50 ml with ultra-pure water. The concentrations of K, Ca, Mg, Na, Fe, Mn, Al,  
326 Cr, Cu, Ni, Zn, and Co in the extracts were analysed by ICP-AES (inductively coupled plasma atomic  
327 emission spectrometry) and Cd, Pb, Tl, and Mo by ICP-MS (inductively coupled plasma mass  
328 spectrometry) (Servicio Central de Análisis de Bizkaia, Leioa-Bizkaia). The validity and accuracy of

329 the procedures were checked using standard reference materials (“Standard Reference Material®  
330 1573a” certified by the National Institute of Standards and Technology).

331

332 Soil characteristics:

333 Soils were sieved to < 2 mm and air-dried. All analyses (except pH) were carried by INRAE soil testing  
334 laboratory (INRAE-LAS, Arras, France), according to French standardised procedures or international  
335 procedures. Soil pH was determined in a distilled water (1:5 v/v soil to solution ratio) and 0.01 M CaCl<sub>2</sub>  
336 extract (1:10 v/v soil to solution ratio; standard NF ISO 10390:2005). The soil organic carbon content  
337 (SOC) and total nitrogen (N<sub>total</sub>) were determined by dry combustion after correction for carbonate  
338 (SOC: NF ISO 10694:1995, N<sub>total</sub>: NF ISO 13878). The available phosphorus (P<sub>Olsen</sub>) was determined  
339 using the Olsen method (NF ISO 11263; sodium bicarbonate extraction). The cation exchange capacity  
340 (CEC) and exchangeable cations (K<sup>+</sup>, Ca<sup>2+</sup>, Mg<sup>2+</sup>, Na<sup>+</sup>, Fe<sup>2+</sup>, Al<sup>3+</sup>, and Mn<sup>2+</sup>) were measured at soil pH  
341 using the cobaltihexamine chloride method (NF X 31–130:1999). The soil texture (5 fractions) was  
342 determined using the Robinson pipette method (NF X 31–107:1983), but only on three soil samples  
343 (composite samples corresponding to the three blocks of the site).

344 Total soil mineral element contents (major and trace) were quantified after solubilisation by fluorhydric  
345 and perchloric acids (NF X 31–147:1996). After complete dissolution, the concentrations of K, Ca, Mg,  
346 Na, Fe, Mn, Al, Cr, Cu, Ni, Zn, and Co in the extracts were analysed by ICP-AES (inductively coupled  
347 plasma atomic emission spectrometry) and Cd, Pb, Tl, and Mo by ICP-MS (inductively coupled plasma  
348 mass spectrometry).

349

350 Soil solution extraction and analyses:

351 Two chemical extractions were realised for the soils to estimate the availability of trace metals: ultra-  
352 pure water and ammonium nitrate 1M (NH<sub>4</sub>-NO<sub>3</sub>). Extraction allows the quantification of the content of  
353 elements adsorbed onto the soil with variable energy depending on the chemical nature of the extractant.  
354 Water extractions make it possible to estimate the content of elements that would be found in the soil  
355 solution. Ammonium nitrate 1 M extractions quantify the elements weakly adsorbed onto the solid phase  
356 by ion exchange at pH=6.

357 Ultra-pure water extraction at soil pH was performed at 1:5 (M/M) soil to solution ratio, stirring on a  
358 roller-shaking table for one hour. At the end of the extraction, the solution was extracted using a  
359 Terumo® 10 ml syringe and filtered using a Sartorius Minisart® 0.22 µm filter and then part of the  
360 solution was acidified at 2 % with HNO<sub>3</sub> for trace metal analysis. The second part was reserved at 4°C  
361 to measure pH (using a microelectrode (pHC4000-8, Radiometer Analytical)), the concentration of  
362 dissolved organic (DOC) and inorganic (IC) carbon (by oxidative combustion (TOC-VCSH, Shimadzu))  
363 and the anions (PO<sub>4</sub><sup>3-</sup> (phosphate anion), NO<sub>2</sub><sup>-</sup> (nitrogen dioxide) and NO<sub>3</sub><sup>-</sup> (nitrate anion)) and the cation  
364 NH<sub>4</sub><sup>+</sup> (ammonium) by colorimetric method (Technicon auto analyser II).  
365 The NH<sub>4</sub>-NO<sub>3</sub> extractions were performed at 1:2.5 (M/M) soil to solution ratio (Symeonides and McRae  
366 1977). The suspensions were shaken on a roller-shaking table for one hour and the solution was extracted  
367 using a Terumo® 10 ml syringe and filtered using a Sartorius Minisart® 0.22 µm filter, and then  
368 acidified with 2 % HNO<sub>3</sub>.

369 The concentrations of P, K, Ca, Mg, Na, Fe, Mn, and Zn in extracts from two extractions were assayed  
370 by ICP-AES and Cd and that of Pb and Cd by GF-AAS.

371

### 372 *Data analyses*

373 Data processing was performed with R, version 3.6.1. (R Core Team 2019). The split-plot design was  
374 analysed by a mixed effect model (*lme* function, package nlme 3.1-143). The biomass harvest factor and  
375 the compensation method factor were fixed effects (main and interaction effects). The block and biomass  
376 harvest factor nested in blocks were random effects associated with the intercept. When detected,  
377 heteroscedasticity was corrected by modelling the variance with the *varIdent()* function (nlme package)  
378 which allows different variances by level of the biomass harvest and compensation methods. Least-  
379 squares means were calculated (emmeans package 1.4.2) and linear contrasts were used to test for  
380 significant differences between treatments and their corresponding controls. When necessary,  
381 the  $P=0.05$  significance probability was adjusted for multiple pairwise comparisons (Tukey's test).  
382 Mean values are shown  $\pm$  one standard error. Data and scripts are available at  
383 <https://doi.org/10.15454/LCU6OZ>.

384 Preliminary analyses of the results showed that the interactions between the BH factor and the CM factor  
385 were almost never statistically significant, and that is why we analysed these factors separately. The lack  
386 of interactions between biomass residues removal and wood ash application has already been reported  
387 (Hagerberg and Wallander 2002).

388 It should be noted that, due to the split-plot design, the statistical power is greater for the CM factor  
389 nested in BH (12 replicates = 3 blocks  $\times$  4 BH treatments) compared to the BH factor (3 replicates = 3  
390 blocks). The main consequence of this split-plot design was greater difficulty in detecting significant  
391 effects of the BH factor.

392

393

## 394 **Results**

### 395 *Initial stand biomass and nutrient content, and effective harvests*

396 The standing biomass of the stand prior to harvests was  $179.1 \pm 3.5 \text{ Mg ha}^{-1}$  of which  $40.1 \pm 0.7 \text{ Mg ha}^{-1}$   
397 were belowground (Table S2). The standing biomass was distributed homogeneously among the  
398 experimental plots, with a coefficient of variation of 1% among the WTH plots to 8% among the SOH  
399 plots (CV=6% at the site scale). This biomass contained nutrient contents of  $24.7 \pm 0.5 \text{ kg-P ha}^{-1}$   
400 (phosphorus) and  $311 \pm 6 \text{ kg-N ha}^{-1}$  (nitrogen; Table S2). The harvesting treatments did not export all  
401 this biomass and its associated nutrients: the effective rate of harvest was measured as 71% for  
402 belowground biomass (in BAH and WTH treatments) and 91% for aboveground biomass (in AAH and  
403 WTH treatments). Within the aboveground biomass pool, the measured harvest rate of canopies  
404 (foliage + twigs + branches) was 53%, with estimated rates of 34%, 44%, and 66% for foliage, twigs  
405 and branches, respectively. The realised export of biomass was  $115.32 \text{ Mg ha}^{-1}$  for the conventional  
406 harvest (SOH), with moderately increased values for more intensive harvests (from +10% for AAH to  
407 +34% for WTH; Figure 1a). Despite their low additional biomass exports, due to the differences in  
408 nutrient contents between tree parts, the non-conventional harvest practices exported a lot more nutrients  
409 than the conventional SOH technique. This was particularly the case for the canopy export of nitrogen  
410 (+74% in AAH; Figure 1b) and the belowground export of potassium (+123% in BAH). In the most

411 impacting treatment (WTH), the increase in nutrient exports was between +64% for P (Figure 1c) and  
412 +145% for N and K (Figure 1b and 1d).

413

414 *Soil properties and fertility (hypothesis H1)*

415 The main soil characteristics were representative of the sandy podzols of the region. For instance, the  
416 mean soil particle size distribution showed the dominance of coarse sand ( $85.7\pm 0.2\%$ ,  $7.5\pm 0.5\%$ ,  
417  $0.7\pm 0.3\%$ ,  $2.4\pm 0.2\%$  and  $3.6\pm 0.3\%$ , for the coarse sand, fine sand, coarse silt, fine silt and clay,  
418 fractions, respectively), and a low initial value of the total soil P content of  $44\pm 17 \mu\text{g-P g}^{-1}$  (see Augusto  
419 et al. (2010) for comparisons).

420 The biomass harvesting treatments had many effects on the soil nutritive status, but the effects depended  
421 on the form of the nutrients and micronutrients. While the AAH treatment showed increases in values  
422 of K, Na, Fe and Mn total contents (Table 2), the pattern was quite different for exchangeable  
423 cations (Table 3) and extractable nutrients (Table 4). Indeed, the nutrients that constitute the so-called  
424 *basic cations* of the CEC (*i.e.*  $\text{K}^+$ ,  $\text{Ca}^{2+}$ ,  $\text{Mg}^{2+}$ , and  $\text{Na}^+$ ) were depleted to varying extents (except for  $\text{K}^+$ )  
425 by the non-conventional harvest practices (AAH, BAH, and WTH) as compared with the SOH  
426 treatment (Table 3). The same pattern applied to Ca, Mg, and to a lesser extent K, that were  $\text{NH}_4\text{-NO}_3$   
427 extracted (Table 4). The losses in these nutrients (Ca, Mg, Mn, and Zn) were generally partly  
428 compensated for by the application of wood ash (Table S1), as shown by the significant increases in  
429 their soil content as compared with the control treatment (Tables 3 and 4).

430 The effects of the treatments on P also depended on the chemical form considered. The soil P content  
431 as measured using the sodium bicarbonate extractant ( $\text{P}_{\text{Olsen}}$ ) showed no significant differences, even if  
432 the non-conventional harvest treatments resulted in a decrease in this soil content (Table 2). This not-  
433 significant trend became significant when considering the P content as measured using the  $\text{NH}_4\text{-NO}_3$   
434 extractant (Table 4). As expected, the application of wood ash did not modify the soil P status.  
435 Surprisingly the P-fertiliser treatment did not improve this P status either.

436 The soil  $\text{N}_{\text{total}}$  content followed the same, but insignificant, trend as for P with low values in the  
437 treatments that involved canopy harvesting (Table 2). The C/N ratio was remarkably irresponsive to all  
438 experimental treatments, but the soil N content was reduced by wood ash application.



439  
440  
441  
442  
443  
444  
445  
446  
447  
448  
449  
450  
451  
452  
453  
454  
455  
456  
457  
458  
459  
460  
461  
462  
463  
464  
465  
466

*Vegetation response (H2)*

The *Biomass Harvesting* treatments and the *Compensatory Methods* treatments showed radically different effects on the tree foliage composition. While the intensity of biomass harvesting had no consequences on foliage nutrient content, applying phosphorus or wood ash influenced most nutrients. As expected, P-fertiliser improved the foliage P content, and the wood ash increased the content of many nutrients and micronutrients (N, P, K, Mg, B, Cu, and Fe; Table 5). Conversely, we did not expect the absence of a significant effect of wood ash on Ca content and, above all, the significant positive effect of the P fertilisation on most elements.

The total aboveground biomass of the spontaneous vegetation remained unaffected by the *Biomass Harvesting* treatments, but changed due to the *Compensatory Methods* treatments with an increasing standing biomass following the ranking: Control  $\leq$  P fertilisation  $\leq$  Ash (Figure S4). For both factors, the proportion of the prominent plant species was influenced by treatments. For the *Biomass Harvesting* factor (BH), the proportion of species adapted to oligotrophic-acidic moorlands (*i.e.* *Molinia caerulea* and ericaceous species) was increased by the intensive harvests as compared with the conventional SOH treatment (Figure S4). The opposite pattern was observed in the wood ash treatment (*Compensation Methods* factor, CM), which strongly decreased the abundance of those moorland-adapted species. The wood ash application and, to a lesser extent, the P fertilisation treatments enhanced the growth of the N-fixers (almost entirely composed of the spiny shrub *Ulex europaeus*).

As expected, the most severe treatments of the *Biomass Harvesting* factor (*i.e.* AAH and WTH) tended to depress the tree growth (field observations and Figure 2), but these trends remained statistically not-significant. Conversely we measured an unexpected significant difference between two treatments of the *Compensatory Methods* factor, with a negative effect of P fertilisation (Figure 2). In addition, the wood ash application tended to improve tree growth.

*Soil organic matter and CEC (H3)*

467 The soil Cation Exchange Capacity (CEC) was strongly and linearly correlated with the quantity of  
468 elements that are commonly found as organic matter in acidic soils, which are organic carbon (SOC)  
469 and total nitrogen ( $N_{\text{total}}$ ). In the case of organic carbon, its soil content explained 76% of the variance  
470 of the exchange capacity ( $CEC = 0.088 \times SOC$ ;  $r^2 = 0.76$ ).

471 Due to the tight proportional relationship between CEC and SOC, the observed effects of the  
472 experimental treatments on these variables were quite similar. The harvest of the belowground biomass  
473 and the application of wood ash both tended to decrease the soil organic matter content and the soil CEC  
474 (Tables 2 and 3). The dissolved organic carbon (DOC) followed a similar pattern with a significant  
475 decrease in concentration after whole-tree harvesting (WTH) and wood ash application (Table 2).

476

#### 477 *Soil acidity status (H4)*

478 Harvesting more biomass than conventionally practiced did not modify any of the soil variables used to  
479 assess the acidic status of a soil (pH-H<sub>2</sub>O, pH-CaCl<sub>2</sub>, Base Saturation of the CEC; Table 3). The absence  
480 of effect on the Base Saturation was the consequence of the concomitant decrease in *basic cations* ( $K^+$ ,  
481  $Ca^{2+}$ ,  $Mg^{2+}$ , and  $Na^+$ ) and CEC.

482 Conversely to biomass harvesting, applying wood ash modified the soil acidity status. The soil pH-H<sub>2</sub>O  
483 value increased by +0.24 unit, and the Base Saturation increased from 39% to 46% of the CEC (Table 3).  
484 The P fertilisation had no effect on soil acidity.

485

#### 486 *Ecosystem content in trace metals (H5)*

487 Overall, the *Biomass Harvesting* treatments generally had no significant effect on the trace elements  
488 (As, Cd, Mo, Ni, Pb, Tl, and Zn) in the ecosystem (Tables 2, 4, 5, 6, S4). The exceptions were a decrease  
489 in soil Pb and Zn contents due to WTH.

490

491 The *Compensatory Methods* also had only a few significant effects on the trace element distribution in  
492 the ecosystem (Tables 2, 4, 5, 6, S4). The most noticeable exceptions were increases of soil Zn content  
493 due to wood ash application (Tables 4 and S4), an effect of P fertilisation on Cd distribution between

494 the soil and trees, and an improvement of Cu content of tree foliage after P or wood ash  
495 application (Table 5).

496

497

## 498 **Discussion**

### 499 *Importance of the study design and the study region for data interpretation*

500 Implementing a careful harvest of adult tree compartments over small areas was hardly feasible because  
501 the machines that collect stumps or canopies need space to work (Figure S2). Consequently, the *Biomass*  
502 *Harvesting* factor could be studied only by using large plots (*i.e.* one ha per plot). With 16 experimental  
503 treatments and three blocks, building a complete factorial experimental design (*i.e.* with 48 large plots)  
504 was not possible because the surface area of 48 ha required was incompatible with the premise of an  
505 area that was initially homogeneous in its properties and past-management. Therefore, we built our  
506 experiment based on a split-plot design. Such a design had one major consequence on data analysis.  
507 Indeed, the number of the subplots –dedicated to the *Compensation Methods* treatments– were four-fold  
508 more numerous than the experimental areas dedicated to *Biomass Harvesting* treatments (Figure S1).  
509 The power of the statistical tests was consequently much lower for the *Biomass Harvesting* factor, so  
510 isolating significant effects was sometimes difficult.

511 The forest region where our experiment took place is atypical from a biogeochemical perspective. As a  
512 matter of fact, the soils of the *Landes de Gascogne* region are among the poorest soils in phosphorus in  
513 the world. While in non-agricultural systems the soil P<sub>-total</sub> content ranges between ~10 and 2,000 µg g<sup>-1</sup>  
514 (Achat et al. 2009; Yang and Post 2011; Bredoire et al. 2016; Augusto et al. 2017), the study region  
515 has a mean value of ~50 µg g<sup>-1</sup> and is within a range of ~10-100 µg g<sup>-1</sup> (Achat et al. 2009; Augusto et  
516 al. 2010). As such, the study region is a hotspot of P limitation and is more similar to ancient landscapes  
517 than to most European forests (Lambers et al. 2010; Vitousek et al. 2010). Being also acidic and poor in  
518 other nutrients and micronutrients (Augusto et al. 2010; Trichet et al. 2018), the soils of the study region  
519 have been identified as having the highest level of vulnerability to biomass exports according to the  
520 national system of forest evaluation (Durante et al. 2019). Poorest of the poor, the study region is also

521 expected to respond strongly and negatively to additional harvests of biomass, which implies that results  
522 should be extrapolated to other regions with caution.

523

524

525 *Consequences of harvesting more biomass on the functioning of an oligotrophic forest*

526 Exporting tree canopies generally enhances the amount of harvested biomass (~ +20% to +50%), but  
527 this is at the expense of losing huge quantities of nutrients (~ +100% to +250%; (Achat et al. 2015a)).

528 Our results (10-34% extra biomass, and 37-145% extra nutrients) fit well with this general pattern. On

529 the other hand, the quantities of exported nutrients of this field experiment are about half of the values

530 used in previous modelling studies (Augusto et al. 2015b; Achat et al. 2018). This was the direct

531 consequences of the harvesting techniques that were purposely used to reduce the losses of nutrients:

532 letting branches shed their needles (Stupak et al. 2008), and harvesting only stumps and coarse roots

533 (Augusto et al. 2015a). Despite these precautions, harvesting more biomass, and above all harvesting

534 the whole-tree, reduced the most available forms of nutrients (K, Ca, Mg, and P) in the soil nutrient

535 pools (-15% to -58%; Table 4). Additional biomass harvests likely also impacted the soil content in

536 organic matter, with negative ripple effects on organic P and CEC, the latter being entirely dependent

537 on organic matter in these sandy soils (Augusto et al. 2010). In the study region the organic forms of P

538 are important for seedling and tree nutrition (Jonard et al. 2009; Achat et al. 2013), which would explain

539 why trees of the subsequent stand have grown more slowly after intensive biomass harvests (even if a

540 longer monitoring is needed to confirm the observed trend; see Table S3). The absence of change in the

541 tree foliage composition might be considered as surprising as foliage nutrient content is often used to

542 assess plant nutrition (CSIRO 1997; Mellert and Göttlein 2012). Nevertheless, maintaining the nutrient

543 content of foliage at the expense of growth is a response commonly observed after the harvest of

544 additional biomass (Achat et al. 2015a), and our results are consistent with this general pattern.

545

546 *Fertilisation and wood ash application as possible mitigation practices*

547 Because phosphorus is the first-order factor that limits tree growth in the study region (Trichet et al.

548 2009), we initially expected that the application of P-fertiliser to mitigate the negative effects of

549 additional harvests, but this was not the case in our experiment. Because the soil was also impoverished  
550 in other major nutrients, and because they are considered as second-order nutritional limitations in this  
551 context (Trichet et al. 2008), tree growth may have been constrained in our experiment by a multi-  
552 element scarcity. Multi-element fertilisation is often put forward as a major advantage of applying wood  
553 ash in forests (Ranius et al. 2018). Both wood ash application and P fertilisation were tested in the  
554 present study.

555 The major effect of applying wood ash was expected to be a change in the acidity status of soils (Reid  
556 and Watmough 2014). A simple approximation states that two tons of ash have the same neutralising  
557 effect as one ton of calcium carbonate (Vance 1996). Our experiment was not an exception and the soil  
558 pH, base saturation and concomitant available calcium and magnesium, were improved by wood ash  
559 application (for results in a similar context to ours, see Gomez-Rey et al. (2013)). The available soil  
560 micronutrient contents of Mn and Zn also logically increased because wood ash contains them in  
561 substantial quantities (Table S1). Whereas the effects of wood ash were expected and straight forward  
562 to interpret, the P fertilisation had surprising outcomes: the soil P status was not improved, and the soil  
563 contents of available Ca and Mg actually decreased by P fertilisation. These results may be explained  
564 by the tree foliage composition that was modified by both P fertilisation and wood ash application, with  
565 increases in concentration values for most nutrients and micronutrients (and even some non-essential  
566 trace metals). Hence, it seemed that the two compensatory methods improved tree nutrition but, for P  
567 fertilisation, it was at the expense of the soil reserves in Ca and Mg.

568 In turn, these changes in the soil properties modified the dynamics of the spontaneous vegetation and of  
569 the tree plantation. The vegetation experienced a shift of species prominence after the wood ash  
570 application, with a decrease in the species typical of acidic moorlands and heathlands (*i.e. Molinia*  
571 *caerulea* and ericaceous species) to the benefit of the local main N-fixer (the shrub *Ulex europaeus*).  
572 The decrease of the abundance of the acidophilus species is logical since wood ash decreased the soil  
573 acidity. The increase of the N-fixer shrub was expected as we are used to observing a positive response  
574 of this leguminous species to P fertilisation (*e.g.* Delerue et al. (2015)), but although the N-fixers  
575 abundance was increased by P fertilisation, it was relatively low compared with previous experiments  
576 (Augusto et al. 2005; Vidal et al. 2019), and lower than results after the wood ash application. This effect

577 has already been reported in the literature (Campillo et al. 2005) and may be the positive consequence  
578 of reducing the ambient acidity on the symbionts of the leguminous species (Slattery and Coventry  
579 1995).

580 Trees that were planted responded differently to the *Compensatory Methods*. Firstly, trees that received  
581 wood ash tended to grow the fastest. This result is consistent with our interpretation that plant growth  
582 in this site was limited by several elements at the same time. Since wood ash application improved the  
583 availability of many nutrients and micronutrients, it was logical that plant growth was enhanced. On the  
584 other hand, the depressive effect of P fertilisation was surprising considering that this practice has proven  
585 its efficiency in the study region for more than half a century (Trichet et al. 2009). As explained above,  
586 it seems that P fertilisation improved the tree foliage composition at the expense of soil fertility, and we  
587 speculate that this soil impoverishment might be at the origin of subsequent degraded tree growth.  
588 However, tis atypical phenomenon requires further investigation.

589 Considering the positive effects of wood ash application on soil acidity and nutrient content, and its  
590 positive repercussion on tree growth, one might conclude that this compensatory method should be  
591 promoted in oligotrophic forests submitted to intensive biomass harvestings. Nevertheless, this  
592 conclusion does not take into account one major drawback of wood ash application in our experiment,  
593 which was a strong decrease of the soil organic matter content, with negative consequences on organic  
594 carbon and total nitrogen contents and soil exchange capacity. Even after correcting for the change in  
595 soil bulk density, the losses of organic carbon were ~10-11% of the initial stock of the topsoil ( $N_{total}$   
596 losses were ~7%). We interpret this decrease as the result of the acidity alleviation by wood ash, which  
597 probably enhanced the soil microbial activity and respiration (Bååth and Arnebrant 1994; Jokinen et al.  
598 2006; Omil et al. 2013).

599 In a meta-analysis, we previously concluded that wood ash had no influence on soil organic carbon  
600 (Augusto et al. 2008a), but this study was almost entirely based on Nordic, or cold temperate  
601 experiments (mean annual temperature < 8.5°C; *e.g.* (Feldkirchner et al. 2003)). Under a warm  
602 temperate climate, wood ash application seems to increase SOC stocks when applied in recent  
603 afforestation of former croplands (Sartori et al. 2007; Ventura et al. 2019), which can be explained by  
604 the initial soil conditions (*i.e.* low SOC values and high pH values) and improved necromass production

605 by plants (*i.e.* litterfall and fine root turnover). In areas with a long history of forest occupation (*i.e.* high  
606 SOC values and often low pH values), to our knowledge, our experiment is only the second study under  
607 a warm temperate climate that has quantified the effect of wood ash on SOC: both studies observed a  
608 possible decrease in organic carbon soil contents (Solla-Gullon et al. 2006).

609

#### 610 *Initial expectations and future anticipation*

611 Most, but not all, of our initial expectations were confirmed by the field experiment. Firstly, as  
612 anticipated, harvesting more biomass aggravated the P scarcity of the local soils, and the application of  
613 wood ash did not modify the soil P content (Hypothesis H1; Table S5). Still in line with our expectations,  
614 the impoverishment of the soil caused by additional harvests of biomass could result in reduced growth  
615 of the subsequent forest stand; wood ash application had positive effects on early tree growth (H2). The  
616 fact that, unexpectedly, P application did not enable trees to overcome P limitation suggested that other  
617 nutritional limitations –such as Ca and Mg– prevented the experimental fertilisation from having an  
618 effect. If our two first hypotheses were fairly well supported by results, the third and fourth hypotheses  
619 received mixed support. Indeed, both high rates of biomass harvesting and wood ash application  
620 decreased the pool of soil organic carbon, but only the former treatment was supposed to do so (H3).  
621 The SOC destocking caused by wood ash application opened perspectives on a large scale (see below).  
622 Similarly, while wood ash application logically improved the acidity status of the soil to a moderate  
623 extent, intensive biomass exports did not deteriorate it, as in many other studies (H4; see above for  
624 possible explanations). Finally, none of the experimental factors had the anticipated major effects on the  
625 trace metal distribution within the ecosystem (H5).

626 Overall, this factorial experiment showed that exporting more forest biomass through the additional  
627 harvests of tree canopies, stumps, and roots had negative consequences on the ecosystem. Additional  
628 harvests have aggravated the poverty of the already oligotrophic soil, which in turn may decrease tree  
629 growth and the soil content of organic carbon in the future (but without any impact either on soil acidity  
630 or on trace metals content). Importantly, applying nutrients as fertiliser or wood ash did not fully  
631 compensate for the negative impact of biomass exports.

632 Beyond the management consequences for the *Les Landes de Gascogne* region, this study may have an  
633 interesting repercussion on research about climate change mitigation. Indeed, the *intensive biomass*  
634 *harvest* strategy (which proposes to harvest more woody biomass to replace fossil C in the production  
635 of energy), in conjunction with the application of wood ash to return part of the exported nutrients, can  
636 be seen as a winning approach in boreal forests because neither biomass harvests (Achat et al. 2015b)  
637 nor wood ash (Augusto et al. 2008a) destock soil carbon in this biome. In temperate forests, intensive  
638 biomass harvests are already known to decrease soil organic carbon (Achat et al. 2015b), but wood ash  
639 was not suspected to do so, probably because current knowledge is based on research carried out in  
640 Nordic countries (Augusto et al. 2008a). This study is among the first field experiments to have tested  
641 the effect of wood ash application on soil organic carbon under a warm temperate climate. Although we  
642 acknowledge that our study is based on only one field experiment and should be followed by others, we  
643 anticipate that, if the negative impact of wood ash on soil carbon sequestration was confirmed in several  
644 other temperate forests, the *intensive biomass harvest* strategy would be inefficient in such ecosystems  
645 and should be replaced by the *old-growth* strategy –consisting of sequestering carbon in the ecosystem–  
646 to mitigate climate change.

647

648

#### 649 **Acknowledgements**

650 We are grateful to the ADEME, GIS G-PMF and the Council of the Nouvelle-Aquitaine region for their  
651 financial support (D.V. PhD grant; SYLVOGENE and PINASTER projects). Similarly, we thank the  
652 ISPA lab for providing the F.B. Master grant. Finally, we are grateful to the Forest Experimental Facility  
653 (UEFP-<https://doi.org/10.15454/1.5483264699193726E12>) for their assistance during the successive  
654 field campaigns, and to Sylvie Bussière, Cécile Coriou, and Catherine Lambrot for their help during the  
655 sample analyses.

656

657

#### 658 **References**

659 Achat DL, Bakker MR, Augusto L, et al (2009) Evaluation of the phosphorus status of P-deficient



- 660 podzols in temperate pine stands: combining isotopic dilution and extraction methods.  
661 Biogeochemistry 92:183–200. doi: 10.1007/s10533-008-9283-7
- 662 Achat DL, Bakker MR, Augusto L, Morel C (2013) Contributions of microbial and physical-chemical  
663 processes to phosphorus availability in Podzols and Arenosols under a temperate forest. Geoderma  
664 211:18–27. doi: DOI 10.1016/j.geoderma.2013.07.003
- 665 Achat DL, Deleuze C, Landmann G, et al (2015a) Quantifying consequences of removing harvesting  
666 residues on forest soils and tree growth—A meta-analysis. For Ecol Manage 348:124–141. doi: doi:  
667 10.1016/j.foreco.2015.03.042
- 668 Achat DL, Fortin M, Landmann G, et al (2015b) Forest soil carbon is threatened by intensive biomass  
669 harvesting. Sci Rep 5:15991
- 670 Achat DL, Martel S, Picart D, et al (2018) Modelling the nutrient cost of biomass harvesting under  
671 different silvicultural and climate scenarios in production forests. For Ecol Manage 429:642–653.  
672 doi: 10.1016/j.foreco.2018.06.047
- 673 Alvarez-Alvarez P, Pizarro C, Barrio-Anta M, et al (2018) Evaluation of tree species for biomass energy  
674 production in Northwest Spain. FORESTS 9:. doi: 10.3390/f9040160
- 675 Andre F, Jonard M, Ponette Q (2010) Biomass and nutrient content of sessile oak (*Quercus petraea*  
676 (Matt.) Liebl.) and beech (*Fagus sylvatica* L.) stem and branches in a mixed stand in southern  
677 Belgium. Sci Total Environ 408:2285–2294. doi: DOI 10.1016/j.scitotenv.2010.02.040
- 678 Aronsson KA, Ekelund NGA (2004) Biological effects of wood ash application to forest and aquatic  
679 ecosystems. J Environ Qual 33:1595–1605. doi: 10.2134/jeq2004.1595
- 680 Augusto L, Achat DL, Bakker MR, et al (2015a) Biomass and nutrients in tree root systems—sustainable  
681 harvesting of an intensively managed *Pinus pinaster* (Ait.) planted forest. Glob Chang Biol  
682 Bioenergy 7:231–243. doi: doi: 10.1111/gcbb.12127
- 683 Augusto L, Achat DL, Jonard M, et al (2017) Soil parent material - A major driver of plant nutrient  
684 limitations in terrestrial ecosystems. Glob Chang Biol 23:3808–3824
- 685 Augusto L, Bakker MR, Meredieu C (2008a) Wood ash applications to temperate forest ecosystems -  
686 potential benefits and drawbacks. Plant Soil 306:181–198. doi: 10.1007/s11104-008-9570-z
- 687 Augusto L, Bakker MR, Morel C, et al (2010) Is “grey literature” a reliable source of data to characterize

- 688 soils at the scale of a region? A case study in a maritime pine forest in southwestern France. *Eur J*  
689 *Soil Sci* 61:807–822
- 690 Augusto L, Crampon N, Saur E, et al (2005) High rates of nitrogen fixation of *Ulex* species in the  
691 understory of maritime pine stands and the potential effect of phosphorus fertilization. *Can J For*  
692 *Res Can Rech For* 35:1183–1192. doi: 10.1139/x05-054
- 693 Augusto L, De Schrijver A, Vesterdal L, et al (2015b) Influences of evergreen gymnosperm and  
694 deciduous angiosperm tree species on the functioning of temperate and boreal forests. *Biol Rev*  
695 90:444–466
- 696 Augusto L, Meredieu C, Bert D, et al (2008b) Improving models of forest nutrient export with equations  
697 that predict the nutrient concentration of tree compartments. *Ann For Sci* 65:. doi:  
698 10.1051/forest:2008059
- 699 Bååth E, Arnebrant K (1994) Growth rate and response of bacterial communities to pH in limed and ash  
700 treated forest soils. *Soil Biol Biochem* 26:995–1001
- 701 Banos V, Dehez J (2017) Le bois-énergie dans la tempête, entre innovation et captation ? Les nouvelles  
702 ressources de la forêt landaise. *Natures Sci Sociétés* 25:122–133
- 703 Bastin JF, Berrahmouni N, Grainger A, et al (2017) The extent of forest in dryland biomes. *Science* (80-  
704 ) 356:635–638
- 705 Bertran P, Bateman MD, Hernandez M, et al (2011) Inland aeolian deposits of south-west France: facies,  
706 stratigraphy and chronology. *J Quat Sci* 26:374–388
- 707 Bredoire F, Bakker MR, Augusto L, et al (2016) What is the P value of Siberian soils? Soil phosphorus  
708 status in south-western Siberia and comparison with a global data set. *Biogeosciences* 13:2493–  
709 2509. doi: 10.5194/bg-13-2493-2016
- 710 Bright RM, Cherubini F, Astrup R, et al (2012) A comment to “Large-scale bioenergy from additional  
711 harvest of forest biomass is neither sustainable nor greenhouse gas neutral”: Important insights  
712 beyond greenhouse gas accounting. *Glob Chang Biol Bioenergy* 4:617–619
- 713 Campillo R, Urquiaga S, Undurraga P, et al (2005) Strategies to optimise biological nitrogen fixation in  
714 legume/grass pastures in the southern region of Chile. *Plant Soil* 273:57–67
- 715 Cappuyns V, Swennen R (2008) The application of pHstat leaching tests to assess the pH-dependent

- 716 release of trace metals from soils, sediments and waste materials. *J Hazard Mater* 158:185–195
- 717 CSIRO (1997) *Plant analysis: an interpretation manual*. CSIRO Publishing, Reuter, D. J. and Robinson,
- 718 J. B. (Eds), Collingwood, Australia
- 719 Delerue F, Gonzalez M, Michalet R, et al (2015) Weak Evidence of Regeneration Habitat but Strong
- 720 Evidence of Regeneration Niche for a Leguminous Shrub. *PLoS One* 10:. doi:
- 721 10.1371/journal.pone.0130886
- 722 Durante S, Augusto L, Achat DL, et al (2019) Diagnosis of forest soil sensitivity to harvesting residues
- 723 removal - A transfer study of soil science knowledge to forestry practitioners. *Ecol Indic* 104:512–
- 724 523. doi: 10.1016/j.ecolind.2019.05.035
- 725 Feldkirchner DC, Wang C, Gower ST, et al (2003) Effects of nutrient and paper mill biosolids
- 726 amendments on the growth and nutrient status of hardwood forests. *For Ecol Manage* 177:95–116.
- 727 doi: 10.1016/S0378-1127(02)00318-3
- 728 Fransson AM, Bergkvist B, Tyler G (1999) Phosphorus solubility in an acid forest soil as influenced by
- 729 form of applied phosphorus and liming. *Scand J For Res* 14:538–544. doi:
- 730 10.1080/02827589950154014
- 731 Garcia W de O, Amann T, Hartmann J (2018) Increasing biomass demand enlarges negative forest
- 732 nutrient budget areas in wood export regions. *Sci Rep* 8:. doi: 10.1038/s41598-018-22728-5
- 733 Gomez-Rey MX, Madeira M, Coutinho J (2013) Soil C and N dynamics, nutrient leaching and fertility
- 734 in a pine plantation amended with wood ash under Mediterranean climate. *Eur J For Res* 132:281–
- 735 295. doi: 10.1007/s10342-012-0674-x
- 736 Gonzalez M, Augusto L, Gallet-Budynek A, et al (2013) Contribution of understory species to total
- 737 ecosystem aboveground and belowground biomass in temperate *Pinus pinaster* Ait. forests. *For*
- 738 *Ecol Manage* 289:38–47. doi: DOI 10.1016/j.foreco.2012.10.026
- 739 Haberl H, Schulze ED, Korner C, et al (2013) Response: complexities of sustainable forest use. *Glob*
- 740 *Chang Biol Bioenergy* 5:1–2
- 741 Hagerberg D, Wallander H (2002) The impact of forest residue removal and wood ash amendment on
- 742 the growth of the ectomycorrhizal external mycelium. *FEMS Microbiol Ecol* 39:139–146. doi:
- 743 10.1016/S0168-6496(01)00207-0

- 744 Hannam KD, Venier L, Allen D, et al (2018) Wood ash as a soil amendment in Canadian forests: what  
745 are the barriers to utilization? *Can J For Res* 48:442–450. doi: 10.1139/cjfr-2017-0351
- 746 IPCC (2014) *Climate Change 2014: Synthesis Report. Fifth Assessment Report*. Geneva, Switzerland
- 747 Jokinen H, Kiikkilä O, Fritze H (2006) Exploring the mechanisms behind elevated microbial activity  
748 after wood ash application. *Soil Biol Biochem* 38:2285–2291
- 749 Jolivet C, Augusto L, Trichet P, Arrouays D (2007) Les sols du massif forestier des Landes de  
750 Gascogne : formation, histoire, propriétés et variabilité spatiale. *Rev For Fr* 59:7–30
- 751 Jonard M, Augusto L, Morel C, et al (2009) Forest floor contribution to phosphorus nutrition:  
752 experimental data. *Ann For Sci* 66:510. doi: 10.1051/forest/2009039
- 753 Jurevics A, Peichl M, Olsson BA, et al (2016) Slash and stump harvest have no general impact on soil  
754 and tree biomass C pools after 32-39 years. *For Ecol Manage* 371:33–41. doi:  
755 10.1016/j.foreco.2016.01.008
- 756 Lambers H, Brundrett MC, Raven JA, Hopper SD (2010) Plant mineral nutrition in ancient landscapes:  
757 high plant species diversity on infertile soils is linked to functional diversity for nutritional  
758 strategies. *Plant Soil* 334:11–31
- 759 Lindner M, Karjalainen T (2007) Carbon inventory methods and carbon mitigation potentials of forests  
760 in Europe: a short review of recent progress. *Eur J For Res* 126:149–156
- 761 Luysaert S, Marie G, Valade A, et al (2018) Trade-offs in using European forests to meet climate  
762 objectives. *Nature* 562:259–262
- 763 Mellert KH, Göttlein A (2012) Comparison of new foliar nutrient thresholds derived from van den  
764 Burg's literature compilation with established central European references. *Eur J For Res*  
765 131:1461–1472
- 766 Mora O, Banos V, Regolini M, Carnus JM (2014) Using scenarios for forest adaptation to climate  
767 change: a foresight study of the Landes de Gascogne Forest 2050. *Ann For Sci* 71:313–324
- 768 Nicholls D, Monserud RA, Dykstra DP (2009) International bioenergy synthesis-Lessons learned and  
769 opportunities for the western United States. *For Ecol Manage* 257:1647–1655
- 770 Nnadi EO, Mbah CN, Nweke AI, Njoku C (2019) Physicochemical properties of an acid ultisol  
771 subjected to different tillage practices and wood-ash amendment: Impact on heavy metal

- 772 concentrations in soil and Castor plant. *Soil Tillage Res* 194:104288
- 773 Nohrstedt HO (2001) Response of coniferous forest ecosystems on mineral soils to nutrient additions:  
774 A review of Swedish experiences. *Scand J For Res* 16:555–573. doi: 10.1080/02827580152699385
- 775 Omil B, Pineiro V, Merino A (2013) Soil and tree responses to the application of wood ash containing  
776 charcoal in two soils with contrasting properties. *For Ecol Manage* 295:199–212. doi:  
777 10.1016/j.foreco.2013.01.024
- 778 Pan YD, Birdsey RA, Fang JY, et al (2011) A large and persistent carbon sink in the world's forests.  
779 *Science* (80- ) 333:988–993
- 780 Pitman RM (2006) Wood ash use in forestry - a review of the environmental impacts. *FORESTRY*  
781 79:563–588. doi: 10.1093/forestry/cpl041
- 782 R Core Team (2019) R: A language and environment for statistical computing. R Foundation for  
783 Statistical Computing; Vienna; Austria. URL <https://www.R-project.org>
- 784 Ranius T, Hamalainen A, Egnell G, et al (2018) The effects of logging residue extraction for energy on  
785 ecosystem services and biodiversity: A synthesis. *J Environ Manage* 209:409–425. doi:  
786 10.1016/j.jenvman.2017.12.048
- 787 Reid C, Watmough SA (2014) Evaluating the effects of liming and wood-ash treatment on forest  
788 ecosystems through systematic meta-analysis. *Can J For Res* 44:867–885. doi: 10.1139/cjfr-2013-  
789 0488
- 790 Sargos J (1997) *Histoire de la forêt landaise. L'horizon Chimérique* (Ed.), Bordeaux, France.
- 791 Sartori F, Lal R, Ebinger MH, Miller RO (2007) Tree species and wood ash affect soil in Michigan's  
792 Upper Peninsula. *Plant Soil* 298:125–144. doi: 10.1007/s11104-007-9345-y
- 793 Saur E, Ranger J, Lemoine B, Gelpe J (1992) Micronutrient Distribution in 16-Year-Old Maritime Pine.  
794 *Tree Physiol* 10:307–316
- 795 Schulze ED, Korner CI, Law BE, et al (2012) Large-scale bioenergy from additional harvest of forest  
796 biomass is neither sustainable nor greenhouse gas neutral. *Glob Chang Biol Bioenergy* 4:611–616
- 797 Slattery JF, Coventry DR (1995) Acid-tolerance and symbiotic effectiveness of *Rhizobium*-  
798 *Leguminosarum* by *Trifolium* isolated from subterranean clover growing in permanent pastures.  
799 *Soil Biol Biochem* 27:111–115. doi: 10.1016/0038-0717(94)00143-O

- 800 Solla-Gullon F, Santalla M, Rodriguez-Soalleiro RJ, Merino A (2006) Nutritional status and growth of  
801 a young *Pseudotsuga menziesii* plantation in a temperate region after application of wood-bark  
802 ash. *For Ecol Manage* 237:312–321. doi: 10.1016/j.foreco.2006.09.054
- 803 Steenari BM, Lindqvist O (1997) Stabilisation of biofuel ashes for recycling to forest soil. *Biomass*  
804 *Bioenergy* 13:39–50. doi: 10.1016/S0961-9534(97)00024-X
- 805 Stromgren M, Egnell G, Olsson BA (2013) Carbon stocks in four forest stands in Sweden 25 years after  
806 harvesting of slash and stumps. *For Ecol Manage* 290:59–66. doi: 10.1016/j.foreco.2012.06.052
- 807 Stupak I, Nordfjell T, Gundersen P (2008) Comparing biomass and nutrient removals of stems and fresh  
808 and predried whole trees in thinnings in two Norway spruce experiments. *Can J For Res Can Rech*  
809 *For* 38:2660–2673
- 810 Symeonides C, McRae SG (1977) The assessment of plant-available cadmium in soils. *J Environ Qual*  
811 6:120–123
- 812 Thiffault E, Hannam KD, Pare D, et al (2011) Effects of forest biomass harvesting on soil productivity  
813 in boreal and temperate forests - A review. *Environ Rev* 19:278–309
- 814 Thom D, Seidl R (2016) Natural disturbance impacts on ecosystem services and biodiversity in  
815 temperate and boreal forests. *Biol Rev* 91:760–781
- 816 Trichet P, Bakker MR, Augusto L, et al (2009) Fifty years of fertilization experiments on *Pinus pinaster*  
817 in southwest France: the importance of phosphorus as a fertilizer. *For Sci* 55:390–402
- 818 Trichet P, Cheval N, Lambrot C, et al (2018) Using a dune forest as a filtering ecosystem for water  
819 produced by a treatment plant - One decade of environmental assessment. *Sci Total Environ*  
820 640:849–861. doi: 10.1016/j.scitotenv.2018.05.263
- 821 Trichet P, Loustau D, Lambrot C, Linder S (2008) Manipulating nutrient and water availability in a  
822 maritime pine plantation: effects on growth, production, and biomass allocation at canopy closure.  
823 *Ann For Sci* 65:
- 824 Vance ED (1996) Land application of wood-fired and combination boiler ashes: An overview. *J Environ*  
825 *Qual* 25:937–944. doi: 10.2134/jeq1996.00472425002500050002x
- 826 Ventura M, Panzacchi P, Muzzi E, et al (2019) Carbon balance and soil carbon input in a poplar short  
827 rotation coppice plantation as affected by nitrogen and wood ash application. *NEW For* 50:969–

- 828           990. doi: 10.1007/s11056-019-09709-w
- 829 Vidal DF, Trichet P, Puzos L, et al (2019) Intercropping N-fixing shrubs in pine plantation forestry as  
830           an ecologically sustainable management option. *For Ecol Manage* 437:175–187
- 831 Vitousek PM, Porder S, Houlton BZ, Chadwick OA (2010) Terrestrial phosphorus limitation:  
832           mechanisms, implications, and nitrogen-phosphorus interactions. *Ecol Appl* 20:5–15
- 833 Wall A (2012) Risk analysis of effects of whole-tree harvesting on site productivity. *For Ecol Manage*  
834           282:175–184
- 835 Walmsley JD, Godbold DL (2010) Stump harvesting for bioenergy - A review of the environmental  
836           impacts. *Forestry* 83:17–38
- 837 Wang P, Olsson BA, Arvidsson H, Lundkvist H (2010) Short-term effects of nutrient compensation  
838           following whole-tree harvesting on soil and soil water chemistry in a young Norway spruce stand.  
839           *Plant Soil* 336:323–336. doi: 10.1007/s11104-010-0484-1
- 840 Yang X, Post WM (2011) Phosphorus transformations as a function of pedogenesis: A synthesis of soil  
841           phosphorus data using Hedley fractionation method. *Biogeosciences* 8:2907–2916
- 842 Zabowski D, Chambreau D, Rotramel N, Thies WG (2008) Long-term effects of stump removal to  
843           control root rot on forest soil bulk density, soil carbon and nitrogen content. *For Ecol Manage*  
844           255:720–727
- 845
- 846

847  
848  
849

**Figure 1** – Realised exports of biomass, nitrogen, and phosphorus

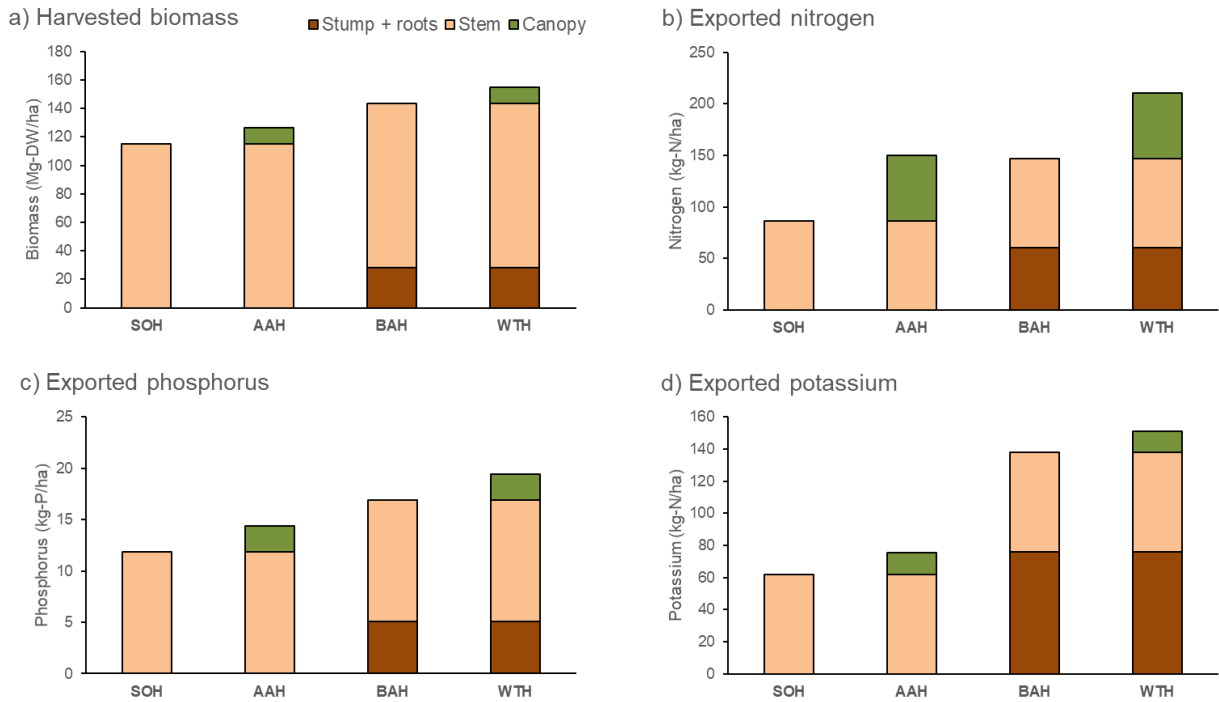

850  
851  
852  
853  
854  
855  
856  
857  
858  
  
859  
  
860

SOH = stem-only harvest; AAH = aboveground additional harvest; BAH = belowground additional harvest; WTH = whole-tree harvest.

All data (including data about calcium, and magnesium) are presented in Table S2.

The methods used to quantify the biomass and nutrient exports are detailed in the manuscript in the section “Plant measurements and field sampling”, in particular in the subsection “Estimates of biomass and nutrient exports”.



861 **Figure 2** – Tree size as affected by biomass harvest and compensation methods  
862

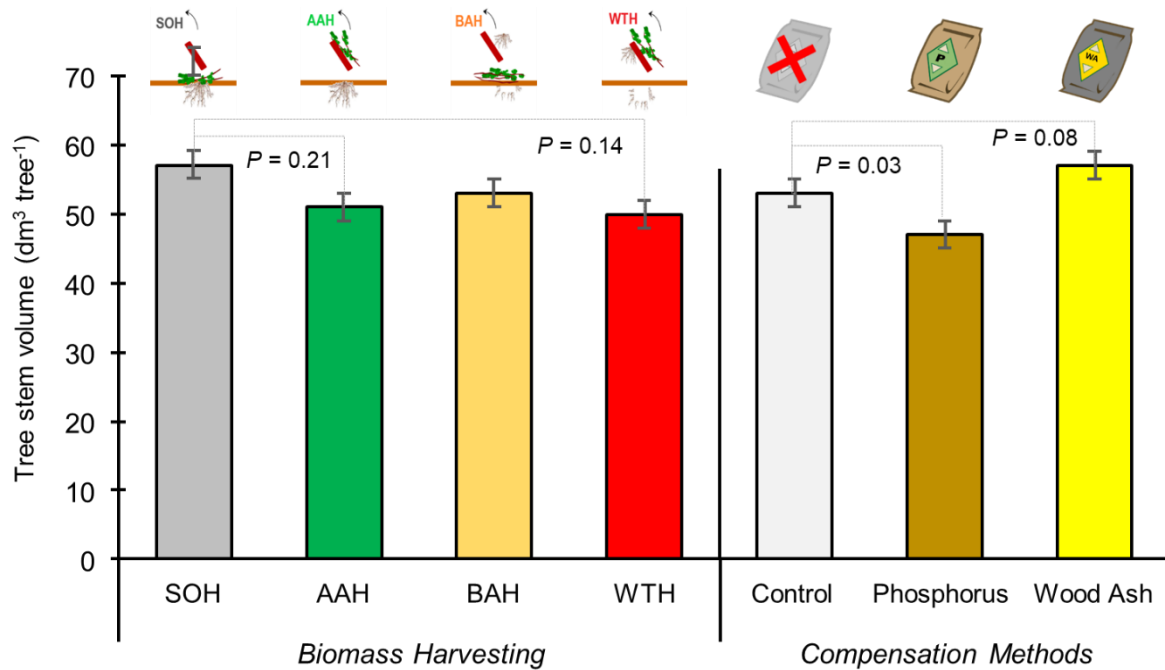

863 SOH = stem-only harvest; AAH = aboveground additional harvest; BAH = belowground  
864 additional harvest; WTH = whole-tree harvest. Control = no nutrient application.  
865 *P* values for differences between treatments of reference (*i.e.* SOH and Control) on the one  
866 hand, and other treatments on the other hand, are indicated in the graph.  
867 Trees were measured at 11 years old.  
868 Other tree metrics are shown in Table S3.

869  
870

871

872

873 **Table 1** – Initial expected consequences of intensive biomass harvesting and wood ash  
 874 application on a temperate oligotrophic forest  
 875 (→: means “has no effect on...”; ↓: means “decreases...”; ↗: means “increases...”; ?: means “unknown  
 876 effect on...”)

| Ecosystem trait                                                                                                                |                          | Intensive harvests                                  | Wood ash                                                        |
|--------------------------------------------------------------------------------------------------------------------------------|--------------------------|-----------------------------------------------------|-----------------------------------------------------------------|
| Soil fertility<br>(phosphorus)<br>{hypothesis H1}                                                                              | <i>General knowledge</i> | ↓ soil P                                            | → soil P                                                        |
|                                                                                                                                | <i>Local conditions</i>  | P-limited soils                                     |                                                                 |
|                                                                                                                                | <i>Expected results</i>  | ↓ (aggravated P-limitation)                         | → (or ↗) soil P                                                 |
| Tree growth<br>(carbon sequestration)<br>{H2}                                                                                  | <i>General knowledge</i> | ↓ tree growth                                       | → (or ↗) tree growth                                            |
|                                                                                                                                | <i>Local conditions</i>  | oligotrophic P-limited ecosystem                    |                                                                 |
|                                                                                                                                | <i>Expected results</i>  | ↓ tree growth                                       | → tree growth                                                   |
| Soil Organic Matter<br>SOM<br>(carbon and nitrogen)<br>{H3}                                                                    | <i>General knowledge</i> | → boreal forests<br>↓ temperate forests             | → boreal forests<br>? temperate forests                         |
|                                                                                                                                | <i>Local conditions</i>  | warm temperate                                      |                                                                 |
|                                                                                                                                | <i>Expected results</i>  | ↓ SOM                                               | → SOM                                                           |
| Soil acidity<br>(pH, base saturation)<br>{H4}                                                                                  | <i>General knowledge</i> | ↓ acido-basic status                                | ↗ acido-basic status                                            |
|                                                                                                                                | <i>Local conditions</i>  | acidic soils                                        |                                                                 |
|                                                                                                                                | <i>Expected results</i>  | ↓ acido-basic status                                | ↗ acido-basic status                                            |
| Trace metals in<br>ecosystem<br>(micronutrients:<br>[B, Cu, Fe, Mn, Mo, Zn]<br>and toxic trace metals<br>[As, Pb, Cd])<br>{H5} | <i>General knowledge</i> | → or ↓ trace metals<br>(due to exports)             | → for podzol soils<br>(boreal soils in Nordic areas)            |
|                                                                                                                                | <i>Local conditions</i>  | low content in tree biomass growing on podzol soils |                                                                 |
|                                                                                                                                | <i>Expected results</i>  | → trace metals                                      | → or ↓ bioavailability<br>at moderate ash dose<br>+ increase pH |

877  
 878  
 879

880

881  
882**Table 2** – Soil properties related to site fertility as affected by biomass harvest and compensation methods

|                             | SOC<br>(mg g <sup>-1</sup> ) | DOC<br>(mg L <sup>-1</sup> ) | N<br>(mg g <sup>-1</sup> ) | C/N<br>unit less | P <sub>Olsen</sub><br>(μg g <sup>-1</sup> ) | K<br>(mg g <sup>-1</sup> ) | Ca<br>(mg g <sup>-1</sup> ) | Mg<br>(mg g <sup>-1</sup> ) | Na<br>(mg g <sup>-1</sup> ) | Fe<br>(mg g <sup>-1</sup> ) | Mn<br>(μg g <sup>-1</sup> ) | Mo<br>(μg g <sup>-1</sup> ) | Zn<br>(μg g <sup>-1</sup> ) |
|-----------------------------|------------------------------|------------------------------|----------------------------|------------------|---------------------------------------------|----------------------------|-----------------------------|-----------------------------|-----------------------------|-----------------------------|-----------------------------|-----------------------------|-----------------------------|
| <i>Biomass Harvesting</i>   |                              |                              |                            |                  |                                             |                            |                             |                             |                             |                             |                             |                             |                             |
| SOH                         | 38.6±3.9                     | 44±2                         | 1.41±0.15                  | 27.7±0.8         | 29.3±2.2                                    | 4.07±0.2                   | 0.82±0.06                   | 0.17±0.09                   | 1.17±0.09                   | 1.8±0.4                     | 41.5±3.5                    | 0.16±0.01                   | 6.60±0.29                   |
| AAH                         | 35.4±3.9                     | 42±4                         | 1.46±0.15                  | 24.5±0.8         | 25.3±2.5                                    | 5.40±0.2 *                 | 0.98±0.06                   | 0.25±0.09                   | 1.65±0.08 *                 | 3.1±0.3 *                   | 62.0±3.5 *                  | 0.21±0.01                   | 7.37±0.48                   |
| BAH                         | 30.2±3.9                     | 39±2                         | 1.14±0.15                  | 26.3±0.8         | 25.3±2.9                                    | 4.31±0.2                   | 0.71±0.04                   | 0.15±0.08                   | 1.22±0.08                   | 2.2±0.3                     | 43.6±3.5                    | 0.15±0.01                   | 5.77±0.36                   |
| WTH                         | 31.1±3.9                     | 31±2 *                       | 1.10±0.15                  | 28.2±0.8         | 21.0±3.5                                    | 4.09±0.2                   | 0.72±0.03                   | 0.11±0.04                   | 1.11±0.05                   | 1.5±0.3                     | 35.4±3.5                    | 0.13±0.01                   | 3.85±0.54 *                 |
| <i>Compensation Methods</i> |                              |                              |                            |                  |                                             |                            |                             |                             |                             |                             |                             |                             |                             |
| Control                     | 37.1±2.9                     | 39±1                         | 1.36±0.11                  | 27.2±0.7         | 27.1±2.4                                    | 4.47±0.13                  | 0.85±0.03                   | 0.18±0.10                   | 1.31±0.05                   | 2.1±0.3                     | 46.6±3.2                    | 0.16±0.01                   | 5.69±0.31                   |
| Phosphorus                  | 33.6±2.9                     | 42±2                         | 1.28±0.11                  | 26.3±0.7         | 24.5±2.4                                    | 4.45±0.26                  | 0.74±0.03 *                 | 0.16±0.08                   | 1.26±0.09                   | 2.0±0.3                     | 45.0±4.9                    | 0.17±0.01                   | 5.57±0.32                   |
| Ash                         | 30.8±2.9 *                   | 36±1 *                       | 1.18±0.11 *                | 26.5±0.7         | 24.0±2.4                                    | 4.50±0.15                  | 0.85±0.03                   | 0.17±0.09                   | 1.31±0.06                   | 2.3±0.3                     | 45.2±2.0                    | 0.16±0.01                   | 6.42±0.36                   |

883  
884  
885  
886  
887  
888  
889

All values are for the total content of the elements in the soil (except for P). SOC = soil organic carbon; DOC = dissolved organic carbon. For phosphorus (P), values are extractable P using the Olsen method.

SOH = stem-only harvest; AAH = aboveground additional harvest; BAH = belowground additional harvest; WTH = whole-tree harvest. Control = no nutrient application.

Treatments with an asterisk differ at  $P < 0.05$  from their reference treatment (SOH or Control, respectively; see Methods).

890  
891

892 **Table 3** – Soil acidity status as affected by biomass harvest and compensation methods

893

|                             | pH-H <sub>2</sub> O<br>unit less | pH-CaCl <sub>2</sub><br>unit less | CEC <sub>m</sub><br>(cmol.c kg <sup>-1</sup> ) | BS<br>(%) | K<br>(cmol.c kg <sup>-1</sup> ) | Ca<br>(cmol.c kg <sup>-1</sup> ) | Mg<br>(cmol.c kg <sup>-1</sup> ) | Na<br>(cmol.c kg <sup>-1</sup> ) |
|-----------------------------|----------------------------------|-----------------------------------|------------------------------------------------|-----------|---------------------------------|----------------------------------|----------------------------------|----------------------------------|
| <i>Biomass Harvesting</i>   |                                  |                                   |                                                |           |                                 |                                  |                                  |                                  |
| SOH                         | 4.43±0.07                        | 3.43±0.08                         | 3.51±0.23                                      | 43±2      | 0.06±0.00                       | 0.92±0.04                        | 0.36±0.02                        | 0.06±0.00                        |
| AAH                         | 4.68±0.07                        | 3.69±0.08                         | 2.90±0.24                                      | 38±2      | 0.06±0.00                       | 0.67±0.03 *                      | 0.21±0.01 *                      | 0.05±0.00                        |
| BAH                         | 4.49±0.07                        | 3.57±0.08                         | 2.51±0.23 *                                    | 42±2      | 0.05±0.00                       | 0.65±0.04 *                      | 0.23±0.02 *                      | 0.04±0.00 *                      |
| WTH                         | 4.51±0.07                        | 3.46±0.08                         | 2.90±0.24                                      | 39±2      | 0.06±0.01                       | 0.69±0.06                        | 0.28±0.02 *                      | 0.04±0.00 *                      |
| <i>Compensation Methods</i> |                                  |                                   |                                                |           |                                 |                                  |                                  |                                  |
| Control                     | 4.41±0.06                        | 3.47±0.07                         | 3.45±0.21                                      | 39±2      | 0.06±0.00                       | 0.74±0.05                        | 0.29±0.01                        | 0.05±0.00                        |
| Phosphorus                  | 4.53±0.05                        | 3.51±0.07                         | 2.58±0.19 *                                    | 38±2      | 0.06±0.00                       | 0.57±0.04 *                      | 0.22±0.02 *                      | 0.04±0.00 *                      |
| Ash                         | 4.65±0.05 *                      | 3.64±0.07                         | 2.84±0.19 *                                    | 46±2 *    | 0.06±0.00                       | 0.89±0.04 *                      | 0.30±0.02                        | 0.05±0.00                        |

894

895 SOH = stem-only harvest; AAH = aboveground additional harvest; BAH = belowground additional harvest; WTH = whole-tree harvest. Control = no nutrient application.

896 CEC<sub>m</sub> = cationic exchange capacity (measured value); BS = base saturation of the CEC, which is the proportion of charges occupied by non-acidic exchangeable cations (K,  
897 Ca, Mg, Na).

898 For consistency between the different terms of its equation, BS was calculated using the effective CEC (CEC<sub>e</sub>: calculated as the sum all the charges of all the analysed cations),  
899 whose values differ slightly from CEC<sub>m</sub> values.

900 Treatments with an asterisk differ at  $P < 0.05$  from their reference treatment (SOH or Control, respectively; see Methods).

901

902

903

904

905

906

907 **Table 4** – Soil composition in NH<sub>4</sub>-NO<sub>3</sub> extractable elements as affected by biomass harvest and compensation methods  
 908

|                             | P<br>(µg g <sup>-1</sup> ) | K<br>(µg g <sup>-1</sup> ) | Ca<br>(µg g <sup>-1</sup> ) | Mg<br>(µg g <sup>-1</sup> ) | Fe<br>(µg g <sup>-1</sup> ) | Mn<br>(µg g <sup>-1</sup> ) | Zn<br>(µg g <sup>-1</sup> ) |
|-----------------------------|----------------------------|----------------------------|-----------------------------|-----------------------------|-----------------------------|-----------------------------|-----------------------------|
| <i>Biomass Harvesting</i>   |                            |                            |                             |                             |                             |                             |                             |
| SOH                         | 1.2±0.3                    | 27±2                       | 178±8                       | 47±2                        | 7.0±1.2                     | 1.5±0.1                     | 0.60±0.05                   |
| AAH                         | 0.5±0.2 *                  | 21±2 (*)                   | 117±10 *                    | 25±2 *                      | 9.7±1.2                     | 1.3±0.1                     | 0.48±0.04                   |
| BAH                         | 0.8±0.2                    | 21±2 (*)                   | 128±8 *                     | 30±2 *                      | 8.2±1.2                     | 1.2±0.1                     | 0.47±0.04                   |
| WTH                         | 0.9±0.2                    | 21±2 (*)                   | 151±12                      | 38±2                        | 6.1±1.2                     | 1.2±0.1                     | 0.45±0.04                   |
| <i>Compensation Methods</i> |                            |                            |                             |                             |                             |                             |                             |
| Control                     | 0.9±0.2                    | 23±1                       | 131±9                       | 35±2                        | 7.2±1.3                     | 1.1±0.1                     | 0.44±0.02                   |
| Phosphorus                  | 0.7±0.2                    | 22±1                       | 117±9                       | 30±2 *                      | 8.5±0.9                     | 1.1±0.1                     | 0.48±0.03                   |
| Ash                         | 0.9±0.1                    | 22±1                       | 183±9 *                     | 40±1 *                      | 7.5±0.5                     | 1.8±0.1 *                   | 0.58±0.06 *                 |

909 SOH = stem-only harvest; AAH = aboveground additional harvest; BAH = belowground additional harvest; WTH = whole-tree harvest. Control = no nutrient application.  
 910  
 911 Treatments with an asterisk differ at  $P < 0.05$  (except for K:  $P$  value  $< 0.10$ ; symbol in brackets) from their reference treatment (SOH or Control, respectively; see Methods).  
 912  
 913  
 914

915

916

917 **Table 5** – Tree nutritional status (needle composition) as affected by biomass harvest and compensation methods

918

|                             | N<br>(mg g <sup>-1</sup> ) | P<br>(mg g <sup>-1</sup> ) | K<br>(mg g <sup>-1</sup> ) | Ca<br>(mg g <sup>-1</sup> ) | Mg<br>(mg g <sup>-1</sup> ) | B<br>(µg g <sup>-1</sup> ) | Cu<br>(µg g <sup>-1</sup> ) | Fe<br>(µg g <sup>-1</sup> ) | Mn<br>(µg g <sup>-1</sup> ) | Mo<br>(µg g <sup>-1</sup> ) | Zn<br>(µg g <sup>-1</sup> ) |
|-----------------------------|----------------------------|----------------------------|----------------------------|-----------------------------|-----------------------------|----------------------------|-----------------------------|-----------------------------|-----------------------------|-----------------------------|-----------------------------|
| <i>Biomass Harvesting</i>   |                            |                            |                            |                             |                             |                            |                             |                             |                             |                             |                             |
| SOH                         | 12.8±0.7                   | 0.64±0.04                  | 4.6±0.1                    | 2.3±0.1                     | 1.4±0.1                     | 16.3±1.0                   | 1.8±0.2                     | 27.8±2.0                    | 96.3±11.0                   | 0.011±0.003                 | 29.8±2.5                    |
| AAH                         | 13.9±0.7                   | 0.69±0.04                  | 4.4±0.1                    | 2.2±0.1                     | 1.5±0.1                     | 16.7±1.0                   | 1.8±0.2                     | 32.1±2.1 *                  | 104.2±10.9                  | 0.014±0.002                 | 32.1±2.5                    |
| BAH                         | 12.1±0.7                   | 0.65±0.04                  | 4.5±0.1                    | 2.2±0.1                     | 1.4±0.1                     | 17.2±1.0                   | 2.0±0.2                     | 27.1±2.0                    | 92.9±11.7                   | 0.009±0.003                 | 30.5±2.5                    |
| WTH                         | 12.6±0.7                   | 0.65±0.05                  | 4.6±0.1                    | 2.3±0.1                     | 1.4±0.1                     | 17.2±1.0                   | 1.8±0.3                     | 28.9±2.9                    | 81.0±11.7                   | 0.012±0.002                 | 32.1±2.5                    |
| <i>Compensation Methods</i> |                            |                            |                            |                             |                             |                            |                             |                             |                             |                             |                             |
| Control                     | 12.3±0.7                   | 0.64±0.04                  | 4.2±0.1                    | 2.2±0.1                     | 1.4±0.1                     | 16.0±0.9                   | 1.7±0.1                     | 27.0±2.1                    | 92.3±9.8                    | 0.011±0.002                 | 29.1±2.2                    |
| Phosphorus                  | 13.6±0.7 *                 | 0.66±0.04 *                | 4.5±0.1 *                  | 2.3±0.1                     | 1.5±0.1 *                   | 18.0±0.9 *                 | 1.9±0.1                     | 30.4±2.1 *                  | 100.1±9.4 *                 | 0.012±0.002                 | 32.7±2.2 *                  |
| Ash                         | 12.7±0.7 *                 | 0.67±0.04 *                | 4.8±0.1 *                  | 2.3±0.1                     | 1.4±0.1                     | 16.6±0.9 *                 | 2.0±0.1                     | 29.6±2.0 *                  | 88.4±9.8                    | 0.012±0.002                 | 31.7±2.2 *                  |

919

920

921

922

923

924

925

SOH = stem-only harvest; AAH = aboveground additional harvest; BAH = belowground additional harvest; WTH = whole-tree harvest. Control = no nutrient application. Treatments with an asterisk differ at  $P < 0.05$  from their reference treatment (SOH or Control, respectively; see Methods).

926 **Table 6** – Ecosystem content in non-essential trace metals

927

|                             | Cadmium                                     |                                                    |                                               | Lead                                       |                                                   |                                               | Arsenic                                        |
|-----------------------------|---------------------------------------------|----------------------------------------------------|-----------------------------------------------|--------------------------------------------|---------------------------------------------------|-----------------------------------------------|------------------------------------------------|
|                             | <i>Soil</i><br>( $\mu\text{g-Cd kg}^{-1}$ ) | <i>Extractable</i><br>( $\mu\text{g-Cd kg}^{-1}$ ) | <i>Foliage</i><br>( $\mu\text{g-Cd g}^{-1}$ ) | <i>Soil</i><br>( $\mu\text{g-Pb g}^{-1}$ ) | <i>Extractable</i><br>( $\mu\text{g-Pb g}^{-1}$ ) | <i>Foliage</i><br>( $\mu\text{g-Pb g}^{-1}$ ) | <i>Foliage</i><br>( $\mu\text{g-As kg}^{-1}$ ) |
| <i>Biomass Harvesting</i>   |                                             |                                                    |                                               |                                            |                                                   |                                               |                                                |
| SOH                         | 33±2                                        | 9.4±0.6                                            | 0.17±0.01                                     | 9.45±0.79                                  | 0.24±0.01                                         | 0.17±0.01                                     | 19±3                                           |
| AAH                         | 33±2                                        | 8.9±0.6                                            | 0.18±0.01                                     | 9.53±0.58                                  | 0.17±0.01                                         | 0.18±0.01                                     | 21±3                                           |
| BAH                         | 30±2                                        | 8.4±0.6                                            | 0.16±0.01                                     | 7.59±0.45                                  | 0.17±0.01                                         | 0.16±0.01                                     | 15±3                                           |
| WTH                         | 26±2                                        | 7.6±0.6                                            | 0.17±0.01                                     | 6.76±0.24 *                                | 0.16±0.01                                         | 0.07±0.01                                     | 21±3                                           |
| <i>Compensation Methods</i> |                                             |                                                    |                                               |                                            |                                                   |                                               |                                                |
| Control                     | 31±1                                        | 8.2±0.5                                            | 0.16±0.01                                     | 8.20±0.39                                  | 0.20±0.01                                         | 0.16±0.01                                     | 16±2                                           |
| Phosphorus                  | 28±1 *                                      | 8.2±0.4                                            | 0.18±0.01 (*)                                 | 8.24±0.39                                  | 0.18±0.01                                         | 0.18±0.01 (*)                                 | 20±4                                           |
| Ash                         | 32±1                                        | 9.4±0.7                                            | 0.17±0.01                                     | 8.57±0.39                                  | 0.17±0.01                                         | 0.17±0.01                                     | 20±4                                           |

928

929 “Soil” = soil substrate (total content of Cd and Pb); “Extractable” = soil extractable with 1M NH<sub>4</sub>-NO<sub>3</sub> extractant; “Foliage” = tree foliage (*i.e.* pine needles) content. It should  
930 be noted that the units used differ among Cd variables.

931 SOH = stem-only harvest; AAH = aboveground additional harvest; BAH = belowground additional harvest; WTH = whole-tree harvest. Control = no nutrient application.

932 Treatments with an asterisk differ at  $P < 0.05$  (for  $P$  value  $< 0.10$ , the symbol is in brackets) from their reference treatment (SOH or Control, respectively; see Methods).

933 Total soil content of nickel (Ni) and thallium (Tl) are not presented. No significant differences were observed for these variables (Ni=1.49  $\mu\text{g g}^{-1}$ ; Tl=0.11  $\mu\text{g g}^{-1}$ ).

934

935

936
